# Supplementary material
Source: PubMed Central journal article supplement (PMC2814248)

## Supplemental Figure 1

Normal lung tissue stained with the three histological stains H&E, Mason's Trichrome, Sirius red, used in this manuscript.

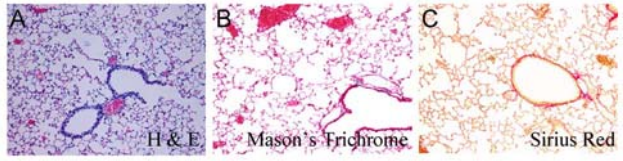

Supplement: NIHMS169356-supplement-suppl_data.pdf [file NIHMS169356-supplement-suppl_data.pdf]
